# Supplementary material for: Highly efficient enrichment of N-linked glycopeptides using a hydrophilic covalent-organic framework
Source: Royal Society of Chemistry journal article supplement (doi:10.1039/c7an01027c), 2017-01-01
Supplement: c7an01027c1.pdf [file c7an01027c1.pdf]

Supporting Information

## **Highly Efficient Enrichment of N-linked Glycopeptides using a Hydrophilic Covalent-Organic Framework**

Yu-Fang Ma, Fang Yuan, Xiao-Hui Zhang, Ying-Lin Zhou\* and Xin-Xiang Zhang\*

Beijing National Laboratory for Molecular Sciences (BNLMS), MOE Key Laboratory of Bioorganic Chemistry and Molecular Engineering, College of Chemistry, Peking University, Beijing 100871, China.

Corresponding Authors' E-mail addresses:

zhouyl@pku.edu.cn, zxx@pku.edu.cn; Fax: +86-10-62754112; Tel: +86-10-62754112.

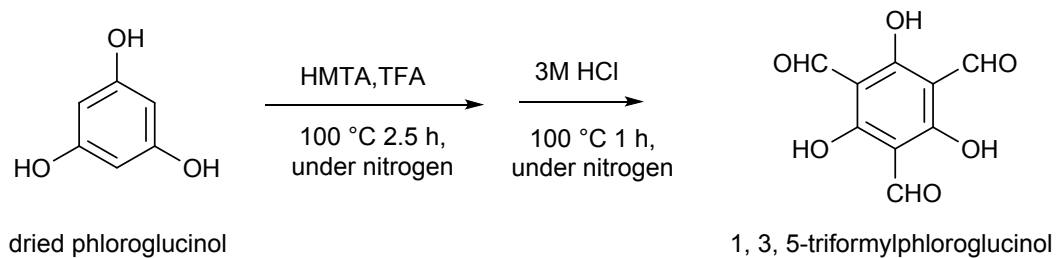

**Scheme S1** Schematic representation of the synthesis of 1, 3, 5-triformylphloroglucinol (Tp).

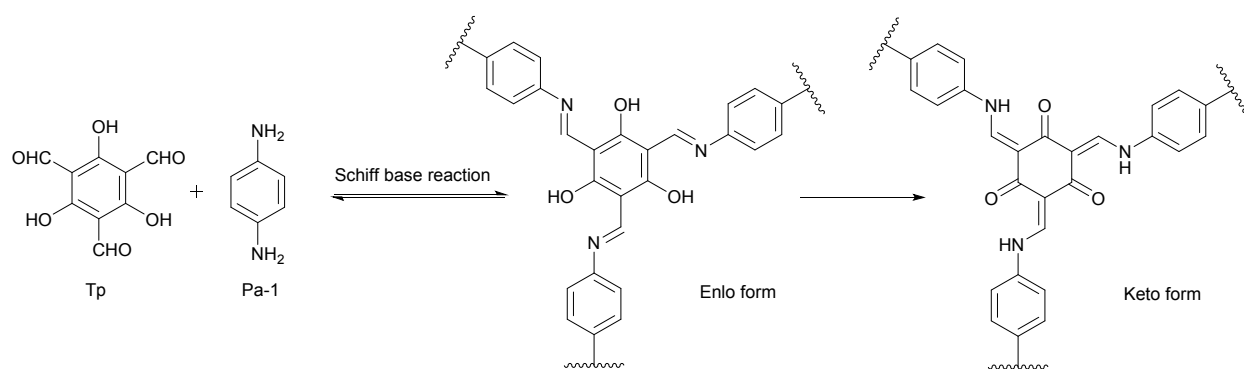

**Scheme S2** Schematic representation of the synthesis of TpPa-1.

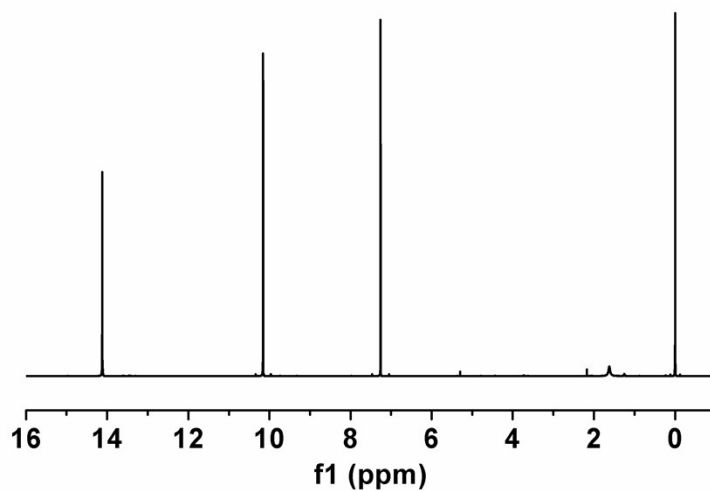

**Fig. S1**  $^1\text{H}$  NMR spectrum of synthesized Tp.

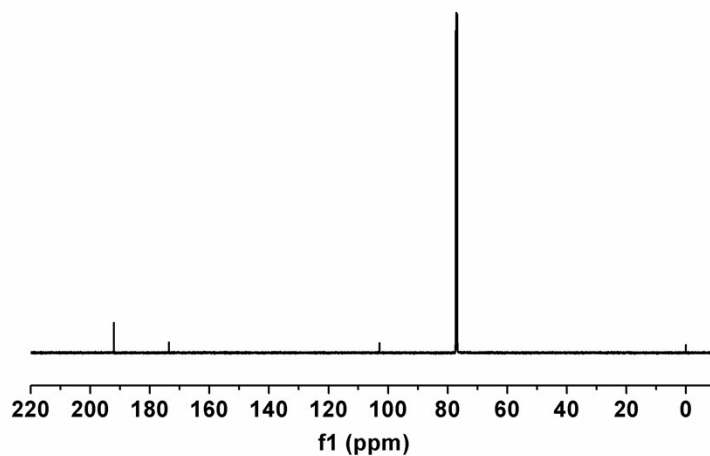

Fig. S2  $^{13}\text{C}$  NMR spectrum of synthesized Tp.

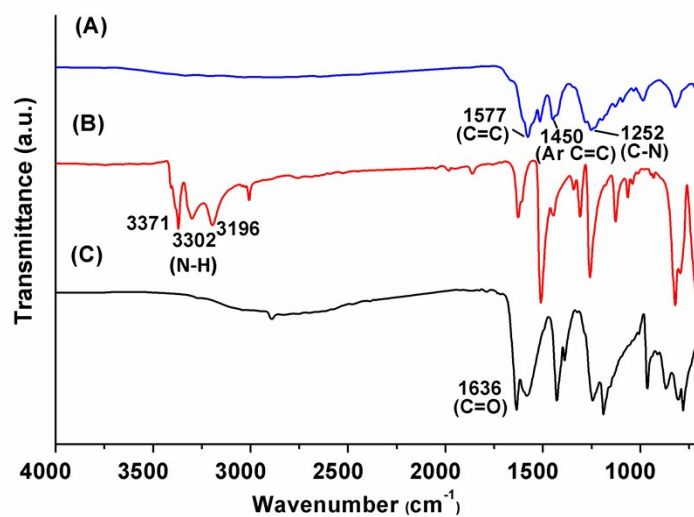

Fig. S3 FT-IR spectra of (A) synthesized TpPa-1, (B) Pa-1 and (C) synthesized Tp.

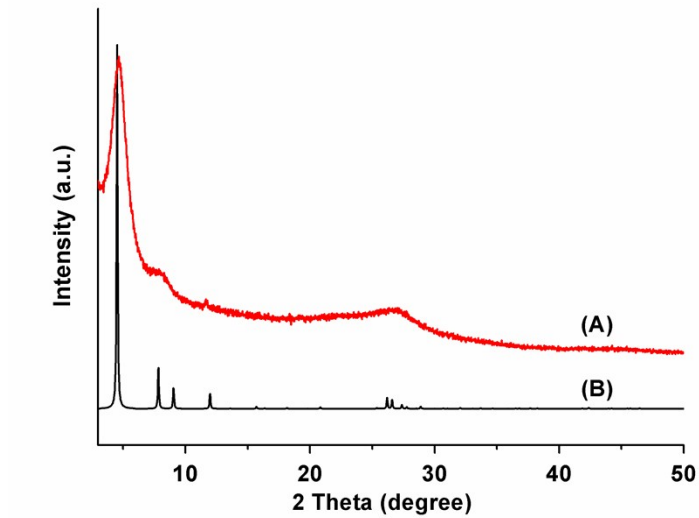

**Fig. S4** XRD patterns of (A) synthesized TpPa-1 and (B) simulated TpPa-1.

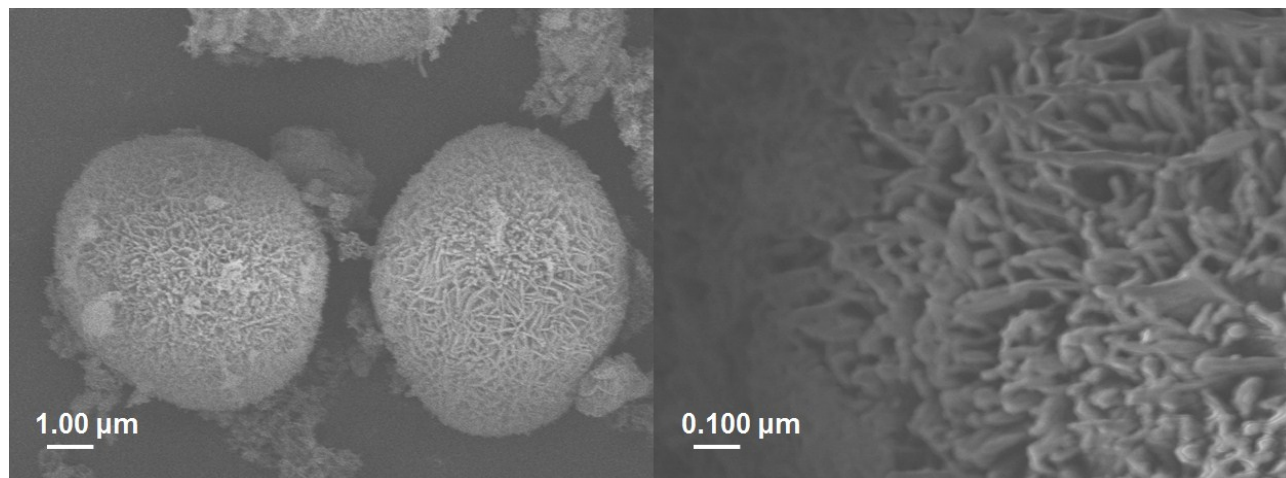

**Fig. S5** SEM images of synthesized TpPa-1.

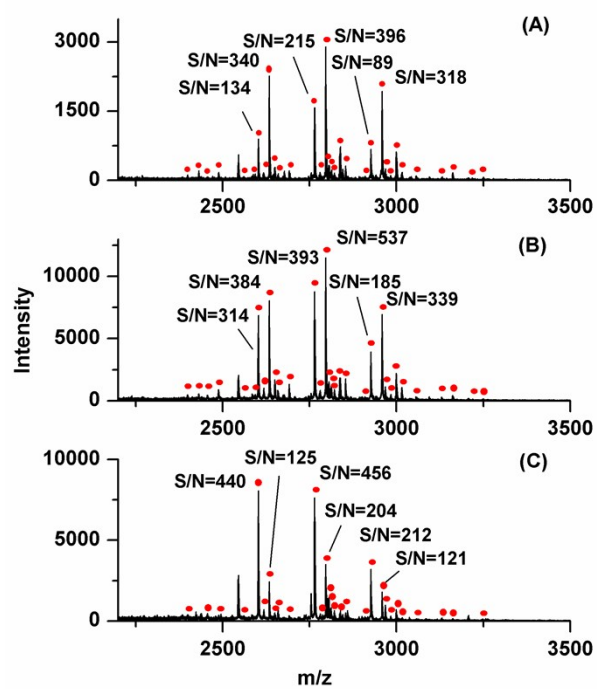

**Fig. S6** MALDI-TOF MS spectra of human IgG tryptic digests after TpPa-1 enrichment with different elution buffers (A) ACN/H<sub>2</sub>O/TFA (79.9/20/0.1, v/v/v), (B) ACN/H<sub>2</sub>O/TFA (84.9/15/0.1, v/v/v) and (C) ACN/H<sub>2</sub>O/TFA (89.9/10/0.1, v/v/v). N-linked glycopeptides are marked with solid red circles.

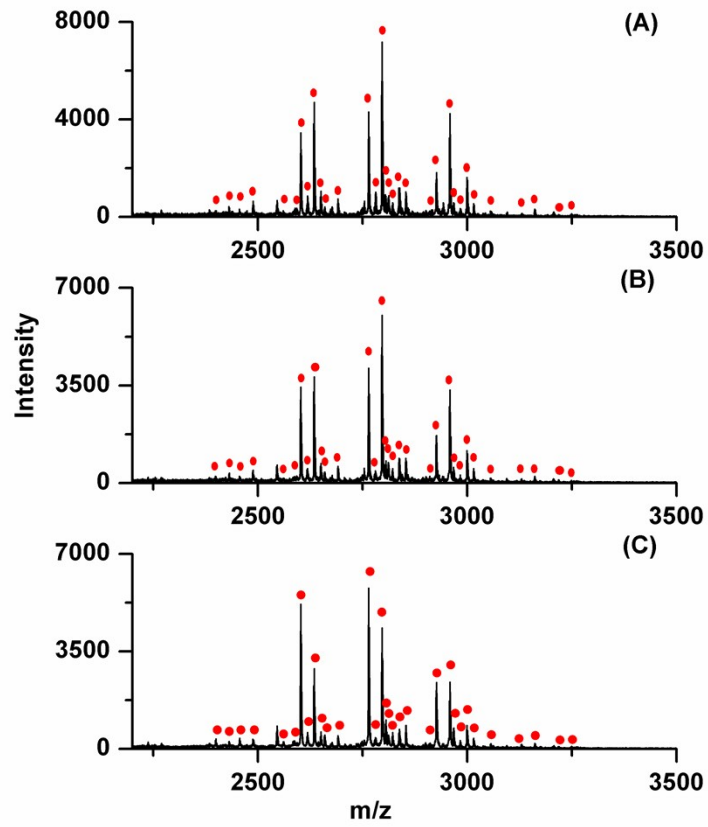

**Fig. S7** MALDI-TOF MS spectra of human IgG tryptic digests after enrichment with TpPa-1 (A) for the third time, (B) for the sixth time and (C) for the tenth time. N-linked glycopeptides are marked with solid red circles.

**Table S1** Observed molecular masses of N-linked glycopeptides and proposed glycan composition of human IgG tryptic digests enriched by TpPa-1. Hex, HexNAc, Fuc and NeuAc are the abbreviations of hexose, N-acetylhexosamine, fucose and N-acetylneuraminic acid, respectively. N# denotes the N-linked glycosylation sites.

| Peak number | Observed m/z | Glycan composite              | Peptide sequence |
|-------------|--------------|-------------------------------|------------------|
| 11          | 2398.7       | [Hex]3[HexNAc]3[Fuc]1         | EEQFN#STFR       |
| 12          | 2430.7       | [Hex]3[HexNAc]3[Fuc]1         | EEQYN#STYR       |
| 13          | 2456.0       | [Hex]3[HexNAc]4               | EEQFN#STFR       |
| 14          | 2487.9       | [Hex]3[HexNAc]4               | EEQYN#STYR       |
| 15          | 2560.9       | [Hex]4[HexNAc]3[Fuc]1         | EEQFN#STFR       |
| 16          | 2592.9       | [Hex]4[HexNAc]3[Fuc]1         | EEQYN#STYR       |
| 17          | 2601.9       | [Hex]3[HexNAc]4[Fuc]1         | EEQFN#STFR       |
| 18          | 2617.9       | [Hex]4[HexNAc]4               | EEQFN#STFR       |
| 19          | 2633.9       | [Hex]3[HexNAc]4[Fuc]1         | EEQYN#STYR       |
| 110         | 2650.0       | [Hex]4[HexNAc]4               | EEQYN#STYR       |
| 111         | 2658.9       | [Hex]3[HexNAc]5               | EEQFN#STFR       |
| 112         | 2690.9       | [Hex]3[HexNAc]5               | EEQYN#STYR       |
| 113         | 2764.1       | [Hex]4[HexNAc]4[Fuc]1         | EEQFN#STFR       |
| 114         | 2780.0       | [Hex]5[HexNAc]4               | EEQFN#STFR       |
| 115         | 2796.1       | [Hex]4[HexNAc]4[Fuc]1         | EEQYN#STYR       |
| 116         | 2804.8       | [Hex]3[HexNAc]5[Fuc]1         | EEQFN#STYR       |
| 117         | 2812.0       | [Hex]5[HexNAc]4               | EEQYN#STFR       |
| 118         | 2820.9       | [Hex]4[HexNAc]5               | EEQFN#STFR       |
| 119         | 2836.9       | [Hex]3[HexNAc]5[Fuc]1         | EEQYN#STYR       |
| 120         | 2853.0       | [Hex]4[HexNAc]5               | EEQYN#STYR       |
| 121         | 2909.8       | [Hex]4[HexNAc]4 [NeuAc]1      | EEQFN#STFR       |
| 122         | 2926.0       | [Hex]5[HexNAc]4[Fuc]1         | EEQFN#STFR       |
| 123         | 2958.0       | [Hex]5[HexNAc]4[Fuc]1         | EEQYN#STYR       |
| 124         | 2967.0       | [Hex]4[Hex7NAc]5[Fuc]1        | EEQFN#STFR       |
| 125         | 2983.1       | [Hex]5[HexNAc]5               | EEQFN#STFR       |
| 126         | 2999.0       | [Hex]4[HexNAc]5[Fuc]1         | EEQYN#STYR       |
| 127         | 3015.1       | [Hex]5[HexNAc]5               | EEQYN#STYR       |
| 128         | 3055.8       | [Hex]4[HexNAc]4[Fuc]1[NeuAc]1 | EEQFN#STFR       |

|     |        |                               |            |
|-----|--------|-------------------------------|------------|
| I29 | 3129.7 | [Hex]5[HexNAc]5[Fuc]1         | EEQFN#STFR |
| I30 | 3160.9 | [Hex]5[HexNAc]5[Fuc]1         | EEQYN#STYR |
| I31 | 3218.0 | [Hex]5[HexNAc]4[Fuc]1[NeuAc]1 | EEQFN#STFR |
| I32 | 3248.9 | [Hex]5[HexNAc]4[Fuc]1[NeuAc]1 | EEQYN#STYR |

**Table S2** Observed molecular masses of N-linked glycopeptides and proposed glycan composition of HRP tryptic digests enriched by TpPa-1. Hex, HexNAc, Fuc and Xyl are the abbreviations of hexose, N-acetylhexosamine, fucose and xylose, respectively. N# denotes the N-linked glycosylation sites.

| Peak number | Observed m/z | Glycan composite                                     | Peptide sequence                 |
|-------------|--------------|------------------------------------------------------|----------------------------------|
| H1          | 1842.5       | [Hex]3[HexNAc]2[Fuc]1[Xyl]1                          | NVGLN#R                          |
| H2          | 2068.6       | [Hex]3[HexNAc]2[Fuc]1[Xyl]1                          | PNVSN#IVR                        |
| H3          | 2541.0       | [Hex]3[HexNAc]2[Fuc]1[Xyl]1                          | SSPN#ATDTIPLVR                   |
| H4          | 2590.7       | [Hex]3[HexNAc]2[Fuc]1[Xyl]1                          | PTLN#TTYLQTLR                    |
| H5          | 2611.7       | [Hex]3[HexNAc]2[Xyl]1                                | MGN#ITPLTGTQGQIR                 |
| H6          | 2802.7       | [Hex]2[HexNAc]2                                      | MGN#ITPLTGTQGQIRLNCR             |
| H7          | 3073.8       | [HexNAc]1[Fuc]1                                      | LHFHDCFVNGCDASILLDN#TTSFR        |
| H8          | 3145.8       | [Hex]3[HexNAc]2[Fuc]1[Xyl]1                          | GLCPLNGN#LSALVDFDLR              |
| H9          | 3188.8       | [HexNAc]1[Fuc]1                                      | LHFHDCFVNGCDASILLDN#TTSFR        |
| H10         | 3206.2       | [Hex]3[HexNAc]2[Xyl]1                                | SFAN#STQTFNFAFVEAMDR             |
| H11         | 3320.8       | [Hex]3[HexNAc]2[Fuc]1[Xyl]1                          | QLTPTFYDNPCPN#VSNIVR             |
| H12         | 3352.8       | [Hex]3[HexNAc]2[Fuc]1[Xyl]1                          | SFAN#STQTFNFAFVEAMDR             |
| H13         | 3369.0       | [Hex]3[HexNAc]2[Fuc]1[Xyl]1                          | SFAN#STQTFNFAFNEAM*DR            |
| H14         | 3377.8       | [Hex]2[HexNAc]2[Fuc]1                                | GLIQSDQELFSSPN#ATDTIPLVR         |
| H15         | 3525.5       | [Hex]3[HexNAc]2[Xyl]1                                | GLIQSDQELFSSPN#ATDTIPLVR         |
| H16         | 3670.9       | [Hex]3[HexNAc]2[Fuc]1[Xyl]1                          | GLIQSDQELFSSPN#ATDTIPLVR         |
| H17         | 3813.2       | [Hex]2[HexNAc]2                                      | LHFHDCFVNGCDASILLDN#TTSFR<br>TEK |
| H18         | 3894.7       | [Hex]3[HexNAc]2[Fuc]1[Xyl]1                          | LHFHDCFVNGCDASILLDN#TTSFR        |
| H19         | 4719.2       | [Hex]3[HexNAc]2[Fuc]1<br>[Hex]3[HexNAc]2[Fuc]1       | LYN#FSNTGLPDPTLN#TTYLQTLR        |
| H20         | 4837.2       | [Hex]3[HexNAc]2[Fuc]1[Xyl]1<br>[Hex]3[HexNAc]2[Xyl]1 | LYN#FSNTGLPDPTLN#TTYLQTLR        |



|     |        |                                                            |                           |
|-----|--------|------------------------------------------------------------|---------------------------|
| H21 | 4851.2 | [Hex]3[HexNAc]2[Fuc]1[Xyl]1<br>[Hex]3[HexNAc]2[Fuc]1       | LYN#FSNTGLPDPTLN#TTYLQTLR |
| H22 | 4982.9 | [Hex]3[HexNAc]2[Fuc]1[Xyl]1<br>[Hex]3[HexNAc]2[Fuc]1[Xyl]1 | LYN#FSNTGLPDPTLN#TTYLQTLR |

**Table S3** Observed N-linked glycopeptides of human serum tryptic digests enriched by TpPa-1. OS=Organism Name, GN=Gene Name, PE=Protein Existence, SV=Sequence Version. N# denotes the N-linked glycosylation sites.

| Protein Accession Number | Protein Description                                                | Peptide Sequence                     |
|--------------------------|--------------------------------------------------------------------|--------------------------------------|
| FETUA_HUMAN              | Alpha-2-HS-glycoprotein<br>OS=Homo sapiens GN=AHSG<br>PE=1 SV=1    | VCQDCPLLAPLN#DTR                     |
| FETUA_HUMAN              | Alpha-2-HS-glycoprotein<br>OS=Homo sapiens GN=AHSG<br>PE=1 SV=1    | KVCQDCPLLAPLN#DTR                    |
| FETUA_HUMAN              | Alpha-2-HS-glycoprotein<br>OS=Homo sapiens GN=AHSG<br>PE=1 SV=1    | AALAAFNAQNN#GSNFQLEEISR              |
| IGHG1_HUMAN              | Ig gamma-1 chain C region<br>OS=Homo sapiens GN=IGHG1<br>PE=1 SV=1 | EEQYN#STYR                           |
| A2MG_HUMAN               | Alpha-2-macroglobulin<br>OS=Homo sapiens GN=A2M<br>PE=1 SV=2       | VSN#QTLSLFFTVLQDVPVR                 |
| A2MG_HUMAN               | Alpha-2-macroglobulin<br>OS=Homo sapiens GN=A2M<br>PE=1 SV=2       | GCVLLSYLN#ETVTVSASLESVR              |
| A2MG_HUMAN               | Alpha-2-macroglobulin<br>OS=Homo sapiens GN=A2M<br>PE=1 SV=2       | SLGNVN#FTVSAEALQSLECGTEVPSVPEH<br>GR |
| A1AT_HUMAN               | Alpha-1-antitrypsin<br>OS=Homo sapiens GN=SERPINA1 PE=1            | YLG#ATAIFFLPDEGK                     |

SV=3

A1AT\_HUMAN Alpha-1-antitrypsin OS=Homo sapiens GN=SERPINA1 PE=1 SV=3 ADTHDEILEGLNFN#LTEIPEAQIHEGFQELL R

CO3\_HUMAN Complement C3 OS=Homo sapiens GN=C3 PE=1 SV=2 TVLTPATNHMGN#VTFTIPANR

HEMO\_HUMAN Hemopexin OS=Homo sapiens GN=HPX PE=1 SV=2 SWPAVGN#CSSALR

HEMO\_HUMAN Hemopexin OS=Homo sapiens GN=HPX PE=1 SV=2 ALPQPQN#VTSLLGCTH

HEMO\_HUMAN Hemopexin OS=Homo sapiens GN=HPX PE=1 SV=2 N#GTGHGN#STHHGPEYMR

IGHG4\_HUMAN Ig gamma-4 chain C region OS=Homo sapiens GN=IGHG4 PE=1 SV=1 EEQFN#STYR

IGHG2\_HUMAN Ig gamma-2 chain C region OS=Homo sapiens GN=IGHG2 PE=1 SV=2 EEQFN#STFR

IGHG3\_HUMAN Ig gamma-3 chain C region OS=Homo sapiens GN=IGHG3 PE=1 SV=2 EEQYN#STFR

CERU\_HUMAN Ceruloplasmin OS=Homo sapiens GN=CP PE=1 SV=1 EHEGAIYPD#TTDFQR

CERU\_HUMAN Ceruloplasmin OS=Homo sapiens GN=CP PE=1 SV=1 ELHHLQEQN#VSNAFLDK

CERU\_HUMAN Ceruloplasmin OS=Homo sapiens GN=CP PE=1 SV=1 EN#LTAPGSDSAVFFEQGTTR

CERU\_HUMAN Ceruloplasmin OS=Homo sapiens GN=CP PE=1 SV=1 ELHHLQEQN#VSNAFLDKGEFYIGSK

CLUS\_HUMAN Clusterin OS=Homo sapiens GN=CLU PE=1 SV=1 HN#STGCLR

CLUS\_HUMAN Clusterin OS=Homo sapiens GN=CLU PE=1 SV=1 EDALN#ETR

CLUS\_HUMAN Clusterin OS=Homo sapiens GN=CLU PE=1 SV=1 KEDALN#ETR

|             |                                             |                              |
|-------------|---------------------------------------------|------------------------------|
|             | GN=CLU PE=1 SV=1                            |                              |
| CLUS_HUMAN  | Clusterin OS=Homo sapiens                   | KKEDALN#ETR                  |
|             | GN=CLU PE=1 SV=1                            |                              |
| CLUS_HUMAN  | Clusterin OS=Homo sapiens                   | LAN#LTQGEDQYYLR              |
|             | GN=CLU PE=1 SV=1                            |                              |
| IGHA2_HUMAN | Ig alpha-2 chain C region OS=Homo sapiens   | TPLTAN#ITK                   |
|             | GN=IGHA2 PE=1 SV=3                          |                              |
| IGHA2_HUMAN | Ig alpha-2 chain C region OS=Homo sapiens   | LSLHRPALEDLLLGSEAN#LTCTLTGLR |
|             | GN=IGHA2 PE=1 SV=3                          |                              |
| IGHA1_HUMAN | Ig alpha-1 chain C region OS=Homo sapiens   | LAGKPTHVN#VSVVMAEVDGTCY      |
|             | GN=IGHA1 PE=1 SV=2                          |                              |
| IGHA1_HUMAN | Ig alpha-1 chain C region OS=Homo sapiens   | LSLHRPALEDLLLGSEAN#LTCTLTGLR |
|             | GN=IGHA1 PE=1 SV=2                          |                              |
| A1AG1_HUMAN | Alpha-1-acid glycoprotein 1 OS=Homo sapiens | EN#GTISR                     |
|             | GN=ORM1 PE=1 SV=1                           |                              |
| A1AG1_HUMAN | Alpha-1-acid glycoprotein 1 OS=Homo sapiens | QDQCIYN#TTYLNVQR             |
|             | GN=ORM1 PE=1 SV=1                           |                              |
| ANT3_HUMAN  | Antithrombin-III OS=Homo sapiens            | WVSN#KTEGR                   |
|             | GN=SERPINC1 PE=1 SV=1                       |                              |
| ANT3_HUMAN  | Antithrombin-III OS=Homo sapiens            | LGACN#DTLQQLMEVFK            |
|             | GN=SERPINC1 PE=1 SV=1                       |                              |
| ANT3_HUMAN  | Antithrombin-III OS=Homo sapiens            | SLTFN#ETYQDISELVYGAK         |
|             | GN=SERPINC1 PE=1 SV=1                       |                              |
| ANT3_HUMAN  | Antithrombin-III OS=Homo sapiens            | LGACN#DTLQQLMEVFKFDTISEK     |
|             | GN=SERPINC1 PE=1 SV=1                       |                              |

SV=1

|            |                           |                 |                                |
|------------|---------------------------|-----------------|--------------------------------|
| ZA2G_HUMAN | Zinc-alpha-2-glycoprotein |                 | DIVEYYN#DSN#GSHVLQGR           |
|            | OS=Homo sapiens           | GN=AZGP1        |                                |
|            | PE=1                      | SV=1            |                                |
| HPT_HUMAN  | Haptoglobin               | OS=Homo sapiens | NLFLN#HSEN#ATAK                |
|            | GN=HP                     | PE=1            | SV=1                           |
| HPT_HUMAN  | Haptoglobin               | OS=Homo sapiens | VVLHPN#YSQVDIGLIK              |
|            | GN=HP                     | PE=1            | SV=1                           |
| HPT_HUMAN  | Haptoglobin               | OS=Homo sapiens | MVSHHN#LTTGATLINEQWLLTTAK      |
|            | GN=HP                     | PE=1            | SV=1                           |
| APOB_HUMAN | Apolipoprotein            | B-100           | YDFN#SSMLYSTAK                 |
|            | OS=Homo sapiens           | GN=APOB         |                                |
|            | PE=1                      | SV=1            |                                |
| APOB_HUMAN | Apolipoprotein            | B-100           | FVEGSHN#STVSLTTK               |
|            | OS=Homo sapiens           | GN=APOB         |                                |
|            | PE=1                      | SV=1            |                                |
| APOB_HUMAN | Apolipoprotein            | B-100           | FN#SSYLQGTNQTGR                |
|            | OS=Homo sapiens           | GN=APOB         |                                |
|            | PE=1                      | SV=1            |                                |
| APOB_HUMAN | Apolipoprotein            | B-100           | VNQNLVYESGLN#FSK               |
|            | OS=Homo sapiens           | GN=APOB         |                                |
|            | PE=1                      | SV=1            |                                |
| APOB_HUMAN | Apolipoprotein            | B-100           | FEVDSPVYN#ATWSASLK             |
|            | OS=Homo sapiens           | GN=APOB         |                                |
|            | PE=1                      | SV=1            |                                |
| APOB_HUMAN | Apolipoprotein            | B-100           | QVFPGLNYCTSGAYSN#ASSTDSASYPLTG |
|            | OS=Homo sapiens           | GN=APOB         | DTR                            |
|            | PE=1                      | SV=1            |                                |
| IGHM_HUMAN | Ig mu chain C region      | OS=Homo sapiens | N#NSDISSTR                     |
|            | GN=IGHM                   | PE=1            | SV=3                           |
| IGHM_HUMAN | Ig mu chain C region      | OS=Homo sapiens | YKN#NSDISSTR                   |
|            | GN=IGHM                   | PE=1            | SV=3                           |
| IGHM_HUMAN | Ig mu chain C region      | OS=Homo sapiens | GLTFQQN#ASSMCVDPQDTAIR         |
|            | GN=IGHM                   | PE=1            | SV=3                           |

|             |                                                                |                                        |
|-------------|----------------------------------------------------------------|----------------------------------------|
| IGHM_HUMAN  | Ig mu chain C region OS=Homo sapiens GN=IGHM PE=1 SV=3         | THTN#ISESHPN#ATFSAVGEASICEDDWNS<br>GER |
| VTNC_HUMAN  | Vitronectin OS=Homo sapiens GN=VTN PE=1 SV=1                   | NN#ATVHEQVGGPSLTSDLQAQSK               |
| CO4A_HUMAN  | Complement C4-A OS=Homo sapiens GN=C4A PE=1 SV=1               | GLN#VTLSTGR                            |
| CO4A_HUMAN  | Complement C4-A OS=Homo sapiens GN=C4A PE=1 SV=1               | FSDGLESN#SSTQFEVK                      |
| APOH_HUMAN  | Beta-2-glycoprotein OS=Homo sapiens GN=APOH PE=1 SV=3          | 1 LGN#WSAMPSCK                         |
| APOH_HUMAN  | Beta-2-glycoprotein OS=Homo sapiens GN=APOH PE=1 SV=3          | 1 VYKPSAGN#NSLYR                       |
| AACT_HUMAN  | Alpha-1-antichymotrypsin OS=Homo sapiens GN=SERPINA3 PE=1 SV=2 | YTGN#ASALFILPDQDK                      |
| AACT_HUMAN  | Alpha-1-antichymotrypsin OS=Homo sapiens GN=SERPINA3 PE=1 SV=2 | FN#LTETSEAEIHQSFQHLLR                  |
| HRG_HUMAN   | Histidine-rich glycoprotein OS=Homo sapiens GN=HRG PE=1 SV=1   | VIDFN#CTTSSVSSALANTK                   |
| CFAH_HUMAN  | Complement factor OS=Homo sapiens GN=CFH PE=1 SV=4             | H MDGASN#VTCINSR                       |
| CFAH_HUMAN  | Complement factor OS=Homo sapiens GN=CFH PE=1 SV=4             | H ISEEN#ETTCYMGK                       |
| CFAH_HUMAN  | Complement factor OS=Homo sapiens GN=CFH PE=1 SV=4             | H IPCSQPPQIEHGTIN#SSR                  |
| A1AG2_HUMAN | Alpha-1-acid glycoprotein OS=Homo sapiens GN=ORM2 PE=1 SV=2    | 2 EN#GTVSR                             |

|             |                                              |                                |
|-------------|----------------------------------------------|--------------------------------|
| A1AG2_HUMAN | Alpha-1-acid glycoprotein 2                  | QNCQFYN#SSYLVNQR               |
|             | OS=Homo sapiens GN=ORM2                      |                                |
|             | PE=1 SV=2                                    |                                |
| CBG_HUMAN   | Corticosteroid-binding globulin              | AQLLQGLGFN#LTER                |
|             | OS=Homo sapiens                              |                                |
|             | GN=SERPINA6 PE=1 SV=1                        |                                |
| KAIN_HUMAN  | Kallistatin                                  | DFYVDEN#TTVR                   |
|             | OS=Homo sapiens                              |                                |
|             | GN=SERPINA4 PE=1 SV=3                        |                                |
| KAIN_HUMAN  | Kallistatin                                  | SQILEGLGFN#LTELSESDVHR         |
|             | OS=Homo sapiens                              |                                |
|             | GN=SERPINA4 PE=1 SV=3                        |                                |
| KNG1_HUMAN  | Kininogen-1                                  | ITYSIVQTN#CSK                  |
|             | OS=Homo sapiens                              |                                |
|             | GN=KNG1 PE=1 SV=2                            |                                |
| KNG1_HUMAN  | Kininogen-1                                  | LNAENN#ATFYFK                  |
|             | OS=Homo sapiens                              |                                |
|             | GN=KNG1 PE=1 SV=2                            |                                |
| C4BPA_HUMAN | C4b-binding protein alpha chain              | LSVDKDQYVEPEN#VTIQCDSGYGVVGPQS |
|             | OS=Homo sapiens                              | ITCSG NR                       |
|             | GN=C4BPA PE=1 SV=2                           |                                |
| APOD_HUMAN  | Apolipoprotein D                             | ADGTVNQIEGEATPVN#LTEPAK        |
|             | OS=Homo sapiens                              |                                |
|             | GN=APOD PE=1 SV=1                            |                                |
| APOD_HUMAN  | Apolipoprotein D                             | ADGTVNQIEGEATPVN#LTEPAKLEVK    |
|             | OS=Homo sapiens                              |                                |
|             | GN=APOD PE=1 SV=1                            |                                |
| FINC_HUMAN  | Fibronectin                                  | DQCIVDDITYNVN#DTFHK            |
|             | OS=Homo sapiens                              |                                |
|             | GN=FN1 PE=1 SV=3                             |                                |
| FINC_HUMAN  | Fibronectin                                  | LDAPTNLQFVN#ETDSTVLVR          |
|             | OS=Homo sapiens                              |                                |
|             | GN=FN1 PE=1 SV=3                             |                                |
| ITIH4_HUMAN | Inter-alpha-trypsin inhibitor heavy chain H4 | LPTQN#ITFQTESSVAEQAEFQSPK      |
|             | OS=Homo sapiens                              |                                |
|             | GN=ITIH4 PE=1 SV=4                           |                                |
| LG3BP_HUMAN | Galectin-3-binding protein                   | DAGVVCTN#ETR                   |
|             | OS=Homo sapiens                              |                                |
|             | GN=LGALS3BP PE=1 SV=1                        |                                |
| LG3BP_HUMAN | Galectin-3-binding protein                   | AAIPSALDTN#SSK                 |
|             | OS=Homo sapiens                              |                                |
|             | GN=LGALS3BP PE=1 SV=1                        |                                |

|             |                                       |                       |                        |
|-------------|---------------------------------------|-----------------------|------------------------|
| LG3BP_HUMAN | Galectin-3-binding protein            | OS=Homo sapiens       | ALGFEN#ATQALGR         |
|             |                                       | GN=LGALS3BP PE=1 SV=1 |                        |
| LG3BP_HUMAN | Galectin-3-binding protein            | OS=Homo sapiens       | GLN#LTEDTYKPR          |
|             |                                       | GN=LGALS3BP PE=1 SV=1 |                        |
| BTD_HUMAN   | Biotinidase                           | OS=Homo sapiens       | FN#DTEVLQR             |
|             |                                       | GN=BTD PE=1 SV=2      |                        |
| BTD_HUMAN   | Biotinidase                           | OS=Homo sapiens       | NPVGLIGAEN#ATGETDPSHSK |
|             |                                       | GN=BTD PE=1 SV=2      |                        |
| AFAM_HUMAN  | Afamin                                | OS=Homo sapiens       | DIENFN#STQK            |
|             |                                       | GN=AFM PE=1 SV=1      |                        |
| AFAM_HUMAN  | Afamin                                | OS=Homo sapiens       | YAEDKFN#ETTEK          |
|             |                                       | GN=AFM PE=1 SV=1      |                        |
| ATRN_HUMAN  | Attractin                             | OS=Homo sapiens       | GICN#SSDVR             |
|             |                                       | GN=ATRN PE=1 SV=2     |                        |
| ATRN_HUMAN  | Attractin                             | OS=Homo sapiens       | IDSTGN#VTNELR          |
|             |                                       | GN=ATRN PE=1 SV=2     |                        |
| ATRN_HUMAN  | Attractin                             | OS=Homo sapiens       | N#HSCSEGQISIFR         |
|             |                                       | GN=ATRN PE=1 SV=2     |                        |
| KLKB1_HUMAN | Plasma kallikrein                     | OS=Homo sapiens       | GVNFN#VSK              |
|             |                                       | GN=KLKB1 PE=1 SV=1    |                        |
| KLKB1_HUMAN | Plasma kallikrein                     | OS=Homo sapiens       | IYSGILN#LSDITK         |
|             |                                       | GN=KLKB1 PE=1 SV=1    |                        |
| KLKB1_HUMAN | Plasma kallikrein                     | OS=Homo sapiens       | IYPGVDFGGEELN#VTFVK    |
|             |                                       | GN=KLKB1 PE=1 SV=1    |                        |
| IGJ_HUMAN   | Immunoglobulin J chain                | OS=Homo sapiens       | EN#ISDPTSPLR           |
|             |                                       | GN=IGJ PE=1 SV=4      |                        |
| FHR1_HUMAN  | Complement factor H-related protein 1 | OS=Homo sapiens       | LQNNENN#ISCOVER        |
|             |                                       | GN=CFHR1 PE=1 SV=2    |                        |
| C4BPB_HUMAN | C4b-binding protein beta chain        | OS=Homo sapiens       | EWDN#TTTECR            |
|             |                                       | GN=C4BPB PE=1 SV=1    |                        |

|             |                                                                               |                                        |
|-------------|-------------------------------------------------------------------------------|----------------------------------------|
| C4BPB_HUMAN | C4b-binding protein beta chain<br>OS=Homo sapiens GN=C4BPB<br>PE=1 SV=1       | LGHCPDPVLVNGEFSSSGPVN#VSDK             |
| MUCB_HUMAN  | Ig mu heavy chain disease<br>protein OS=Homo sapiens<br>PE=1 SV=1             | THTN#ISESHPN#ATFSAVGEASICEDDWDS<br>GER |
| CFAI_HUMAN  | Complement factor I OS=Homo<br>sapiens GN=CFI PE=1 SV=1                       | FLNN#GTCTAEGK                          |
| CFAI_HUMAN  | Complement factor I OS=Homo<br>sapiens GN=CFI PE=1 SV=1                       | LSDLSIN#STECLHVHCR                     |
| PON1_HUMAN  | Serum<br>paraoxonase/arylesterase 1<br>OS=Homo sapiens GN=PON1<br>PE=1 SV=2   | HAN#WTLTPLK                            |
| PON1_HUMAN  | Serum<br>paraoxonase/arylesterase 1<br>OS=Homo sapiens GN=PON1<br>PE=1 SV=2   | VTQVYAEN#GTVLQGSTVASVYK                |
| PEDF_HUMAN  | Pigment epithelium-derived<br>factor OS=Homo sapiens<br>GN=SERPINF1 PE=1 SV=3 | VTQN#LTLIEESLTSEFIHDIDR                |
| CO9_HUMAN   | Complement component C9<br>OS=Homo sapiens GN=C9 PE=1<br>SV=2                 | AVN#ITSENLIDDVSLIR                     |
| LUM_HUMAN   | Lumican OS=Homo sapiens<br>GN=LUM PE=1 SV=2                                   | LHINHNN#LTESVGPLPK                     |
| LUM_HUMAN   | Lumican OS=Homo sapiens<br>GN=LUM PE=1 SV=2                                   | LGSFEGLVN#LTFIHLQHNR                   |
| LUM_HUMAN   | Lumican OS=Homo sapiens<br>GN=LUM PE=1 SV=2                                   | AFEN#VTDLQWLILDHNLLENSK                |
| CPN2_HUMAN  | Carboxypeptidase N subunit 2<br>OS=Homo sapiens GN=CPN2<br>PE=1 SV=2          | AFGSNPN#LTK                            |
| CPN2_HUMAN  | Carboxypeptidase N subunit 2<br>OS=Homo sapiens GN=CPN2                       | LYLGSNN#LTALHPALFQN#LSK                |



PE=1 SV=2

|             |                                                      |                                       |                                |
|-------------|------------------------------------------------------|---------------------------------------|--------------------------------|
| IBP3_HUMAN  | Insulin-like growth factor-binding protein 3         | OS=Homo sapiens GN=IGFBP3 PE=1 SV=2   | GLCVN#ASAVSR                   |
| THRB_HUMAN  | Prothrombin                                          | OS=Homo sapiens GN=F2 PE=1 SV=2       | GHVN#ITR                       |
| THRB_HUMAN  | Prothrombin                                          | OS=Homo sapiens GN=F2 PE=1 SV=2       | N#FTENDLLVR                    |
| THRB_HUMAN  | Prothrombin                                          | OS=Homo sapiens GN=F2 PE=1 SV=2       | YPHKPEIN#STTHPGADLQENFCR       |
| C1QA_HUMAN  | Complement subcomponent subunit A                    | C1q OS=Homo sapiens GN=C1QA PE=1 SV=2 | RNPPMGGNVVIFDTVITNQEEPYQN#HSGR |
| TSP1_HUMAN  | Thrombospondin-1                                     | OS=Homo sapiens GN=THBS1 PE=1 SV=2    | VVN#STTGPGEHLR                 |
| HEP2_HUMAN  | Heparin cofactor 2                                   | OS=Homo sapiens GN=SERPIND1 PE=1 SV=3 | DFVN#ASSK                      |
| SEPP1_HUMAN | Selenoprotein P                                      | OS=Homo sapiens GN=SEPP1 PE=1 SV=3    | EGYSN#ISYIVVNHQGISSR           |
| CHP1_HUMAN  | Calcium-binding protein p22                          | OS=Homo sapiens GN=CHP PE=1 SV=3      | GEN#GTLSR                      |
| IGHD_HUMAN  | Ig delta chain C region                              | OS=Homo sapiens GN=IGHD PE=1 SV=2     | TLLN#ASR                       |
| CHLE_HUMAN  | Cholinesterase                                       | OS=Homo sapiens GN=BCHE PE=1 SV=1     | DN#NSIITR                      |
| PHLD_HUMAN  | Phosphatidylinositol-glycan-specific phospholipase D | OS=Homo sapiens GN=GPLD1 PE=1 SV=3    | N#LTTSLTESVDR                  |

|             |                                                                                                     |                                      |
|-------------|-----------------------------------------------------------------------------------------------------|--------------------------------------|
| PGRP2_HUMAN | N-acetylmuramoyl-L-alanine<br>amidase OS=Homo sapiens<br>GN=PGLYRP2 PE=1 SV=1                       | GFGVAIVGN#YTAALPTEAALR               |
| PGRP2_HUMAN | N-acetylmuramoyl-L-alanine<br>amidase OS=Homo sapiens<br>GN=PGLYRP2 PE=1 SV=1                       | LEPVHLQLQCMSQEQLAQAAN#ATK            |
| APOM_HUMAN  | Apolipoprotein M OS=Homo sapiens<br>GN=APOM PE=1 SV=2                                               | TELFSSSCP GGIMLN#ETGQG YQR           |
| LPAL2_HUMAN | Apolipoprotein(a)-like protein<br>2 OS=Homo sapiens GN=LPAL2<br>PE=2 SV=1                           | WEYCN#LTR                            |
| THBG_HUMAN  | Thyroxine-binding globulin<br>OS=Homo sapiens<br>GN=SERPINA7 PE=1 SV=2                              | TLYETEVFSTDFSN#ISAAK                 |
| CO6_HUMAN   | Complement component C6<br>OS=Homo sapiens GN=C6 PE=1<br>SV=3                                       | VLN#FTTK                             |
| WDTC1_HUMAN |                                                                                                     | VN#ITR                               |
| LAMB2_HUMAN | Laminin subunit beta-2<br>OS=Homo sapiens GN=LAMB2<br>PE=1 SV=2                                     | VN#LTR                               |
| PLTP_HUMAN  | Phospholipid transfer protein<br>OS=Homo sapiens GN=PLTP<br>PE=1 SV=1                               | VSN#VSCQASVSR                        |
| FA10_HUMAN  | Coagulation factor X OS=Homo sapiens<br>GN=F10 PE=1 SV=2                                            | GDNN#LTR                             |
| LYAM1_HUMAN | L-selectin OS=Homo sapiens<br>GN=SELL PE=1 SV=2                                                     | DN#YTDLVAIQNK                        |
| C1S_HUMAN   | Complement C1s subcomponent OS=Homo sapiens<br>GN=C1S PE=1 SV=1                                     | NCGVN#CSGDVFTALIGEIASPNYPKYPEN<br>SR |
| LYVE1_HUMAN | Lymphatic vessel endothelial<br>hyaluronic acid receptor 1<br>OS=Homo sapiens GN=LYVE1<br>PE=1 SV=2 | ANQQLN#FTEAK                         |

---
